# Supplementary material for: Cytotoxic Escherichia coli strains encoding colibactin and cytotoxic necrotizing factor (CNF) colonize laboratory macaques
Source: PubMed Central journal article supplement (PMC5718112; doi:10.1186/s13099-017-0220-y), 2017-12-06
Supplement: 13099_2017_220_MOESM1_ESM.pdf [file 13099_2017_220_MOESM1_ESM.pdf]

Table S1. Genes, primers, and annealing temperature used for amplification

| Gene                     | Primer designation | Primer sequence (5' to 3') | Annealing temperature (°C) | Reference                        |
|--------------------------|--------------------|----------------------------|----------------------------|----------------------------------|
| 16S rRNA <sup>a</sup>    | 9F (F24)           | GAGTTTGATYMTGGCTCAG        | 58                         | Harper CG,2003                   |
|                          | F16                | TAGATACCCYGGTAGTCC         |                            | Shen Z,2001                      |
| <i>clbA</i> <sup>a</sup> | IHAPJPN42 (clbAr)  | CAGATACACAGATACCATTCA      | 55                         | Johnson JR, 2008, Buboïs D, 2010 |
|                          | IHAPJPN46 (clbAf)  | CTAGATTATCCGTGGCGATTCC     |                            |                                  |
| <i>clbQ</i> <sup>a</sup> | IHAPJPN55 (clbQr)  | TTATCCTGTTAGCTTTCGTTC      | 55                         | Johnson JR, 2008, Buboïs D, 2010 |
|                          | IHAPJPN56 (clbQf)  | CTTGTATAGTTACACAATATTTTC   |                            |                                  |
| Multiplex <i>cnf</i>     | CNF-s              | TTATATAGACAAGATGGA         | 55                         | Toth I, 2003                     |
|                          | CNF-as             | CATAAAGCTTTACAATATTGA      |                            |                                  |
| <i>cnf1</i>              | CNF-1s             | GGGGGAAGTACAGAAGAATTA      | 55                         | Toth I, 2003                     |
|                          | CNF-1as            | TTGCCGTCCACTCTCACCAGT      |                            |                                  |
| <i>cnf2</i>              | CNF-2s             | TATCATACGGGCAGGAGGAAGCACC  | 55                         | Toth I, 2003                     |
|                          | CNF-2as            | GTCACAATAGACAATAATTTTCCG   |                            |                                  |
| multiplex <i>cdt</i>     | cdt-s1             | GAAAGTAAATGGAATATAAATGTCCG | 55                         | Toth I, 2003                     |
|                          | cdt-as1            | AAATCACCAAGAATCATCCAGTTA   |                            |                                  |
| <i>yjaA</i>              | YjaA.1             | TGAAGTGTGAGGAGACGCTG       | 55                         | Clermont D,2000                  |
|                          | YjaA.2             | ATGGAGAATGCGTTCCTCAAC      |                            |                                  |
| TSPE4.C2                 | TspE4C2.1          | GAGTAATGTCGGGGCATTCA       | 55                         | Clermont D,2000                  |
| (DNA fragment)           | TspE4C2.2          | CGCGCCAACAAAGTATTACG       |                            |                                  |
| <i>chuA</i>              | ChuA.1             | GACGAACCAACGGTCAGGAT       | 55                         | Clermont D,2000                  |
|                          | ChuA.2             | TGCCGCCAGTACCAAGACA        |                            |                                  |
| <i>svg</i>               | svg.1              | TCCGGCTGATTACAAACCAAC      | 55                         | Bidet P, 2007                    |
|                          | svg.2              | CTGCACGAGGTTGTAGTCTG       |                            |                                  |
| <i>uidA</i>              | P3                 | TATGAACTGTGCGTCACAGCC      | 55                         | Heininger A, 1999                |
|                          | P4                 | CATCAGCACGTTATCGAATCC      |                            |                                  |

<sup>a</sup>, Primers also used for sequencing;

## References for Table S1:

- [1] Harper CG, Xu S, Rogers AB, Feng Y, Shen Z, Taylor NS et al. Isolation and characterization of novel *helicobacter* spp. From the gastric mucosa of harp seals *phoca groenlandica*. Dis Aquat Organ 2003; 57:1-9.
- [2] Shen Z, Feng Y, Dewhirst FE, Fox JG. Coinfection of enteric *helicobacter* spp. And *campylobacter* spp. In cats. J Clin Microbiol 2001; 39:2166-72.
- [3] Johnson JR, Johnston B, Kuskowski MA, Nougayrede JP, Oswald E. Molecular epidemiology and phylogenetic distribution of the *Escherichia coli* pks genomic island. J Clin Microbiol 2008; 46:3906-11.
- [4] Dubois D, Delmas J, Cady A, Robin F, Sivignon A, Oswald E et al. Cyclomodulins in urosepsis strains of *Escherichia coli*. J Clin Microbiol 2010; 48:2122-29.
- [5] Tóth I, Héroult F, Beutin L, Oswald E. Production of cytolethal distending toxins by pathogenic *Escherichia coli* strains isolated from human and animal sources: establishment of the existence of a new cdt variant (Type IV). J Clin Microbiol. 2003;41(9):4285-91
- [6] Clermont O, Bonacorsi S, Bingen E. Rapid and simple determination of the *Escherichia coli* phylogenetic group. Appl Environ Microbiol 2000; 66:4555-58.
- [7] Bidet P, Metais A, Mahjoub-Messai F, Durand L, Dehem M, Aujard Y et al. Detection and identification by pcr of a highly virulent phylogenetic subgroup among extraintestinal pathogenic *Escherichia coli* b2 strains. Appl Environ Microbiol 2007; 73:2373-77.
- [8] Heininger A, Binder M, Schmidt S, Unertl K, Botzenhart K, Döring G. Pcr and blood culture for detection of *Escherichia coli* bacteremia in rats. J Clin Microbiol 1999; 37:2479-82.

**Table S2. Virulence Genes**

| Isolates                | Gene                                 | Product                                                              | Virulence Function/Comments                                                                                                                                                                                                                                                                                                                                                                                                               | References                                                                                                           |
|-------------------------|--------------------------------------|----------------------------------------------------------------------|-------------------------------------------------------------------------------------------------------------------------------------------------------------------------------------------------------------------------------------------------------------------------------------------------------------------------------------------------------------------------------------------------------------------------------------------|----------------------------------------------------------------------------------------------------------------------|
| S1, S2                  | <i>astA</i>                          | Enteroaggregative E. coli (Eaggec) Heat-Stable Enterotoxin 1 (EAST1) | Activates guanylyl cyclase resulting in ion secretion<br>Possibly contributes to watery diarrheal disease                                                                                                                                                                                                                                                                                                                                 | Croxen, M.A., 2010; Kaper, J.B. , 2004; Turner, S.M., 2006                                                           |
| S1, S2, S4, S5          | <i>celb</i>                          | Endonuclease Colicin E2                                              | Bacteriocin – DNA nuclease that translocates into susceptible E. coli strains and causes cell death via DNA damage<br>Hypothesized to provide competitive survival advantage colicin-expressing, pathogenic E. coli strains.<br>Mostly identified in B2 or D phylogroup                                                                                                                                                                   | Alonso, G., 2000; Duche, D., 2007; Gordon, D.M., 2006; Lechner, M., et al., 2016; Micenkova, L., 2016                |
| S1, S2, S3, S6, S9, S10 | <i>cnf1</i>                          | Cytotoxic Nectrotizing Factor 1                                      | Glutamine deaminase that targets Rho family GTPases (RhoA, Cdc42 and Rac) leading to constitutive “on” activity that causes aberrant actin cytoskeletal alterations, G2/M cell cycle arrest with multi-nucleation and cellular enlargement, and anti-apoptotic/pro-survival signaling pathways<br>Promotes persistence of epithelial colonization niches and invasion/dissemination of infection.<br>May contribute toward carcinogenesis | Buc, E., 2013; Croxen, M.A., 2010; Flores-Mireles, A.L., 2015; Kaper, J.B. , 2004                                    |
| S1-S10                  | <i>gad</i>                           | Glutamate Decarboxylase                                              | Promotes survival in acid environments by neutralizing cytoplasmic pH via decarboxylation of glutamate and export of $\gamma$ -aminobutyric acid<br>May allow survival through stomach for intestinal colonization during transmission of infection                                                                                                                                                                                       | Bergholz, T.M., 2007; Grant, M.A., 2001; Shin, S., 2001                                                              |
| S3, S6, S9, S10         | <i>iha</i>                           | Iron-Regulated Gene Homologue Adhesin                                | Adhesion factor – adherence to epithelial cells to promote colonization of host<br>Expression increased in iron depleted environments                                                                                                                                                                                                                                                                                                     | Johnson, J.R., 2005; Rashid, R.A., 2006; Tarr, P.I., 2000                                                            |
| S1, S2, S4, S5          | <i>iroN</i>                          | Enterobactin Siderophore Receptor Protein                            | Iron acquisition – transportation of iron-chelated siderophore into bacteria                                                                                                                                                                                                                                                                                                                                                              | Caza, M., 2013; Flores-Mireles, A.L., 2015; Kaper, J.B. , 2004                                                       |
| S1-S10                  | <i>iss</i>                           | Increased Serum Survival/Bor Protein Precursor                       | Outer membrane protein – promotes resistance against killing by host complement proteins<br>Possibly promote survival against innate immune system during systemic dissemination/infection                                                                                                                                                                                                                                                | Johnson, T.J. , 2008; Lynne, A.M., 2007; Miajlovic, H., 2014                                                         |
| S7, S9                  | <i>lpfA</i>                          | Long Polar Fimbriae                                                  | Adhesion factor – adherence to intestinal epithelial cells to promote colonization of host                                                                                                                                                                                                                                                                                                                                                | Jordan, D.M., 2004; Ross, B.N., et al., 2015; Torres, A.G., 2009                                                     |
| S1, S2, S4, S5          | <i>mchB, mchC, mchF, mcmA</i>        | Microcin H47 Synthesis and Transport                                 | Bacteriocin - ribosomally-synthesized peptide antibiotic against susceptible bacterial species<br>Hypothesized to provide competitive survival advantage microcin -expressing, pathogenic E. coli strains.<br>Mostly identified in B2 or D phylogroup.<br>Association between microcin H47 and higher number of virulence genes in genome                                                                                                 | Abraham, S., 2012; Budic, M., 2011; Micenkova, L., 2014.; Micenkova, L., 2016; Lavina, M., 1990; Rodriguez, E., 1990 |
| S4, S5                  | <i>pic</i>                           | Protease Involved in Intestinal Colonization                         | Serine Protease autotransporters of Enterobacteriaceae (SPATE)<br>Mucinase activity may mediate degradation of mucus or mucin as a nutrient source and facilitate penetration/invasion through mucous barrier layer<br>Protease activity may cause serum resistance possibly by degradation of complement proteins                                                                                                                        | Croxen, M.A., 2010; Dautin, N., 2010; Kaper, J.B., 2004; Welch, R.A., 2016                                           |
| S1, S2, S4, S5          | pks Gene Island ( <i>clbA-clbR</i> ) | Colibactin                                                           | Genotoxin that causes G2/M cell cycle arrest, megalocytosis, and DNA damage to cell lines in vitro<br>Associated with colorectal cancer in human patients and potentiates carcinogenesis/tumor formation in mouse model                                                                                                                                                                                                                   | Arthur, J.C., 2012; Buc, E., 2013; García, A., 2016; Nougayrede, J.P., 2006                                          |
| S1, S2, S4, S5          | <i>vat</i>                           | Vacuolating Autotransporter Toxin                                    | Serine Protease Autotransporters of Enterobacteriaceae (SPATE)<br>Vacuolating activity causes intracellular vacuoles to cell lines in vitro                                                                                                                                                                                                                                                                                               | Guignot, J., A., 2015; Welch, R.A., 2016                                                                             |
| S3, S6, S9, S10         | <i>sat</i>                           | Secreted Autotransporter Toxin                                       | Serine Protease Autotransporters of Enterobacteriaceae (SPATE)<br>Cytotoxicity characterized by vacuolating activity, elongated morphology, plate detachment, and death to cell lines in vitro<br>May degrade tight junctions between intestinal epithelial cells to promote invasion                                                                                                                                                     | Dautin, N.,2010; Welch, R.A., 2016                                                                                   |

## References for Table S2:

1. Abraham, S., et al., Molecular characterization of *Escherichia coli* strains that cause symptomatic and asymptomatic urinary tract infections. *J Clin Microbiol*, 2012. 50(3): p. 1027-30.
2. Alonso, G., G. Vilchez, and V. Rodriguez Lemoine, How bacteria protect themselves against channel-forming colicins. *Int Microbiol*, 2000. 3(2): p. 81-8.
3. Arthur, J.C., et al., Intestinal inflammation targets cancer-inducing activity of the microbiota. *Science*, 2012. 338(6103): p. 120-3.
4. Bergholz, T.M., et al., Recent gene conversions between duplicated glutamate decarboxylase genes (*gadA* and *gadB*) in pathogenic *Escherichia coli*. *Mol Biol Evol*, 2007. 24(10): p. 2323-33.
5. Buc, E., et al., High Prevalence of Mucosa-Associated *E. coli* Producing Cyclomodulin and Genotoxin in Colon Cancer. *PLoS One*, 2013. 8(2).
6. Budic, M., et al., *Escherichia coli* bacteriocins: antimicrobial efficacy and prevalence among isolates from patients with bacteraemia. *PLoS One*, 2011. 6(12): p. e28769.
7. Caza, M. and J.W. Kronstad, Shared and distinct mechanisms of iron acquisition by bacterial and fungal pathogens of humans. *Front Cell Infect Microbiol*, 2013. 3: p. 80.
8. Croxen, M.A. and B.B. Finlay, Molecular mechanisms of *Escherichia coli* pathogenicity. *Nat Rev Microbiol*, 2010. 8(1): p. 26-38.
9. Dautin, N., Serine protease autotransporters of enterobacteriaceae (SPATEs): biogenesis and function. *Toxins (Basel)*, 2010. 2(6): p. 1179-206.
10. Duche, D., Colicin E2 is still in contact with its receptor and import machinery when its nuclease domain enters the cytoplasm. *J Bacteriol*, 2007. 189(11): p. 4217-22.
11. Flores-Mireles, A.L., et al., Urinary tract infections: epidemiology, mechanisms of infection and treatment options. *Nat Rev Microbiol*, 2015. 13(5): p. 269-84.
12. García, A., et al., Cytotoxic *Escherichia coli* strains encoding colibactin colonize laboratory mice. *Microbes and Infection*.
13. Gordon, D.M. and C.L. O'Brien, Bacteriocin diversity and the frequency of multiple bacteriocin production in *Escherichia coli*. *Microbiology*, 2006. 152(Pt 11): p. 3239-44.
14. Grant, M.A., S.D. Weagant, and P. Feng, Glutamate Decarboxylase Genes as a Prescreening Marker for Detection of Pathogenic *Escherichia coli* Groups. *Applied and Environmental Microbiology*, 2001. 67(7): p. 3110-3114.
15. Guignot, J., A. Segura, and G. Tran Van Nhieu, The Serine Protease EspC from Enteropathogenic *Escherichia coli* Regulates Pore Formation and Cytotoxicity Mediated by the Type III Secretion System. *PLoS Pathogens*, 2015. 11(7): p. e1005013.
16. Johnson, J.R., et al., The IrgA homologue adhesin Iha is an *Escherichia coli* virulence factor in murine urinary tract infection. *Infect Immun*, 2005. 73(2): p. 965-71.
17. Johnson, T.J., Y.M. Wannemuehler, and L.K. Nolan, Evolution of the *iss* gene in *Escherichia coli*. *Appl Environ Microbiol*, 2008. 74(8): p. 2360-9.
18. Jordan, D.M., et al., Long polar fimbriae contribute to colonization by *Escherichia coli* O157:H7 in vivo. *Infect Immun*, 2004. 72(10): p. 6168-71.
19. Kaper, J.B., J.P. Nataro, and H.L. Mobley, Pathogenic *Escherichia coli*. *Nat Rev Microbiol*, 2004. 2(2): p. 123-40.
20. Lavina, M., C. Gaggero, and F. Moreno, Microcin H47, a chromosome-encoded microcin antibiotic of *Escherichia coli*. *J Bacteriol*, 1990. 172(11): p. 6585-8.
21. Lechner, M., et al., Hierarchical Post-transcriptional Regulation of Colicin E2 Expression in *Escherichia coli*. *PLoS Comput Biol*, 2016. 12(12): p. e1005243.
22. Lynne, A.M., et al., Detection of *Iss* and *Bor* on the surface of *Escherichia coli*. *J Appl Microbiol*, 2007. 102(3): p. 660-6.
23. Miajlovic, H. and S.G. Smith, Bacterial self-defence: how *Escherichia coli* evades serum killing. *FEMS Microbiol Lett*, 2014. 354(1): p. 1-9.
24. Micenkova, L., et al., Bacteriocin-encoding genes and ExPEC virulence determinants are associated in human fecal *Escherichia coli* strains. *BMC Microbiol*, 2014. 14: p. 109.
25. Micenkova, L., et al., Microcin determinants are associated with B2 phylogroup of human fecal *Escherichia coli* isolates. *Microbiologyopen*, 2016. 5(3): p. 490-8.
26. Nougayrede, J.P., et al., *Escherichia coli* induces DNA double-strand breaks in eukaryotic cells. *Science*, 2006. 313(5788): p. 848-51.
27. Rashid, R.A., P.I. Tarr, and S.L. Moseley, Expression of the *Escherichia coli* IrgA homolog adhesin is regulated by the ferric uptake regulation protein. *Microb Pathog*, 2006. 41(6): p. 207-17.
28. Rodriguez, E., C. Gaggero, and M. Lavina, The structural gene for microcin H47 encodes a peptide precursor with antibiotic activity. *Antimicrob Agents Chemother*, 1999. 43(9): p. 2176-82.
29. Ross, B.N., et al., The Role of Long Polar Fimbriae in *Escherichia coli* O104:H4 Adhesion and Colonization. *PLoS One*, 2015. 10(10): p. e0141845.
30. Shin, S., et al., An activator of glutamate decarboxylase genes regulates the expression of enteropathogenic *Escherichia coli* virulence genes through control of the plasmid-encoded regulator, *Per*. *Mol Microbiol*, 2001. 41(5): p. 1133-50.
31. Tarr, P.I., et al., Iha: a novel *Escherichia coli* O157:H7 adherence-conferring molecule encoded on a recently acquired chromosomal island of conserved structure. *Infect Immun*, 2000. 68(3): p. 1400-7.
32. Torres, A.G., et al., Genes related to long polar fimbriae of pathogenic *Escherichia coli* strains as reliable markers to identify virulent isolates. *J Clin Microbiol*, 2009. 47(8): p. 2442-51.
33. Turner, S.M., et al., Weapons of mass destruction: virulence factors of the global killer enterotoxigenic *Escherichia coli*. *FEMS Microbiol Lett*, 2006. 263(1): p. 10-20.
34. Welch, R.A., Uropathogenic *Escherichia coli*-Associated Exotoxins. *Microbiol Spectr*, 2016. 4(3).
